# Supplementary material
Source: PubMed Central journal article supplement (PMC7061986)
Supplement: rstb20190342supp1.pdf [file rstb20190342supp1.pdf]

Supplementary material for:

## **An atlas of transposable element induced alternative splicing in cancer**

Evan A. Clayton<sup>1</sup>, Lavanya Rishishwar<sup>2,3,4</sup>, Tzu-Chuan Huang<sup>2</sup>, Saurabh Gulati<sup>2</sup>, Dongjo Ban<sup>1</sup>, John F. McDonald<sup>1</sup> and I. King Jordan<sup>2,3,4\*</sup>

<sup>1</sup>Integrated Cancer Research Center, School of Biological Sciences, Georgia Institute of Technology, Atlanta, GA, USA

<sup>2</sup>School of Biological Sciences, Georgia Institute of Technology, Atlanta, GA, USA

<sup>3</sup>PanAmerican Bioinformatics Institute, Cali, Colombia

<sup>4</sup>Applied Bioinformatics Laboratory, Atlanta, GA, USA

### Table of Contents

|                             |           |
|-----------------------------|-----------|
| Supplementary Table 1.....  | 2         |
| Supplementary Figure 1..... | 3         |
| Supplementary Figure 2..... | 4         |
| Supplementary Figure 3..... | 5         |
| Supplementary Figure 4..... | 6         |
| Supplementary Figure 5..... | 7         |
| Supplementary Figure 6..... | 8         |
| Supplementary Figure 7..... | 9         |
| <b>References</b> .....     | <b>11</b> |

Supplementary Table 1. **Data sources, programs, and statistical methods used in this study.**

| Name                                      | Description                                                                                                                                                                         | Reference |
|-------------------------------------------|-------------------------------------------------------------------------------------------------------------------------------------------------------------------------------------|-----------|
| <i>Data Sources</i>                       |                                                                                                                                                                                     |           |
| TCGA                                      | RNA-seq data from matched normal-tumor patient samples from 13 cancer types                                                                                                         | [1]       |
| COSMIC (v88)                              | Cancer Gene Census (CGC) annotations for 723 cancer-associated genes                                                                                                                | [2]       |
| RepeatMasker (3.2.7)                      | Genomic coordinates and annotations for human TEs                                                                                                                                   | [3]       |
| NCBI RefSeq (GRCh37.p13 – 2017-04-19)     | Genomic coordinates (exon/intron boundaries) for human genes                                                                                                                        | [4]       |
| GENCODE (v19)                             | Genomic coordinates (exon/intron boundaries) for human genes                                                                                                                        | [5]       |
| Genomic Data Commons (GDC)                | Coordinates and event counts of alternative splicing events in TCGA samples                                                                                                         | [6]       |
| <i>Programs</i>                           |                                                                                                                                                                                     |           |
| SplAdder (1.2.0)                          | Detection and quantification of alternative splicing events                                                                                                                         | [7]       |
| BEDTools (2.28)                           | Identification of alternative splicing events collocated near TE sequences                                                                                                          | [8]       |
| DESeq2 (3.9)                              | Normalization of alternative splice isoform expression across patients within a cancer type                                                                                         | [9]       |
| UCSC Genome Browser (hg19)                | Visualization of putative TE-derived isoforms in cancer associated genes                                                                                                            | [10]      |
| <i>Statistical Methods</i>                |                                                                                                                                                                                     |           |
| Variance Stabilizing Transformation (VST) | Blind transformation used to remove the experiment-wide trend of variance over mean, normalize alternative splice isoform expression values and produce log <sub>2</sub> scale data | [9]       |
| Single linkage clustering                 | Algorithm to merge overlapping alternative splice isoforms based on $\geq 75\%$ overlap of isoform genomic coordinates in an agglomerative fashion                                  |           |
| Relative expression change (REC)          | Quantification of the normalized change in expression levels of TE-derived alternative splice isoforms in tumor versus normal tissue                                                |           |
| G-test                                    | Maximum likelihood statistical significance test for 2x2 isoform expression contingency matrix                                                                                      |           |

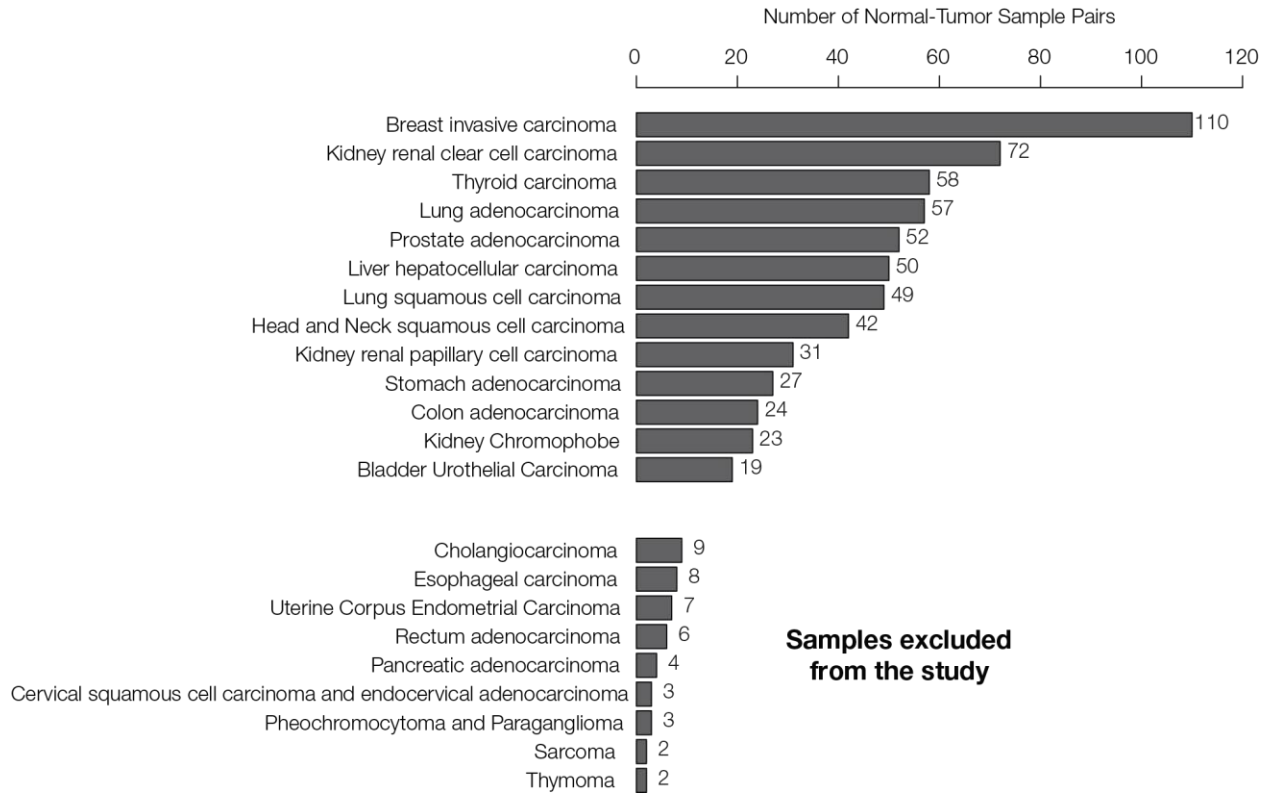

Supplementary Figure 1. **Number of patient samples per cancer type analyzed here.** RNA-seq data for matched normal-tumor sample pairs were taken from The Cancer Genome Atlas (TCGA). Cancers with less than 10 sample pairs were excluded from further analysis.

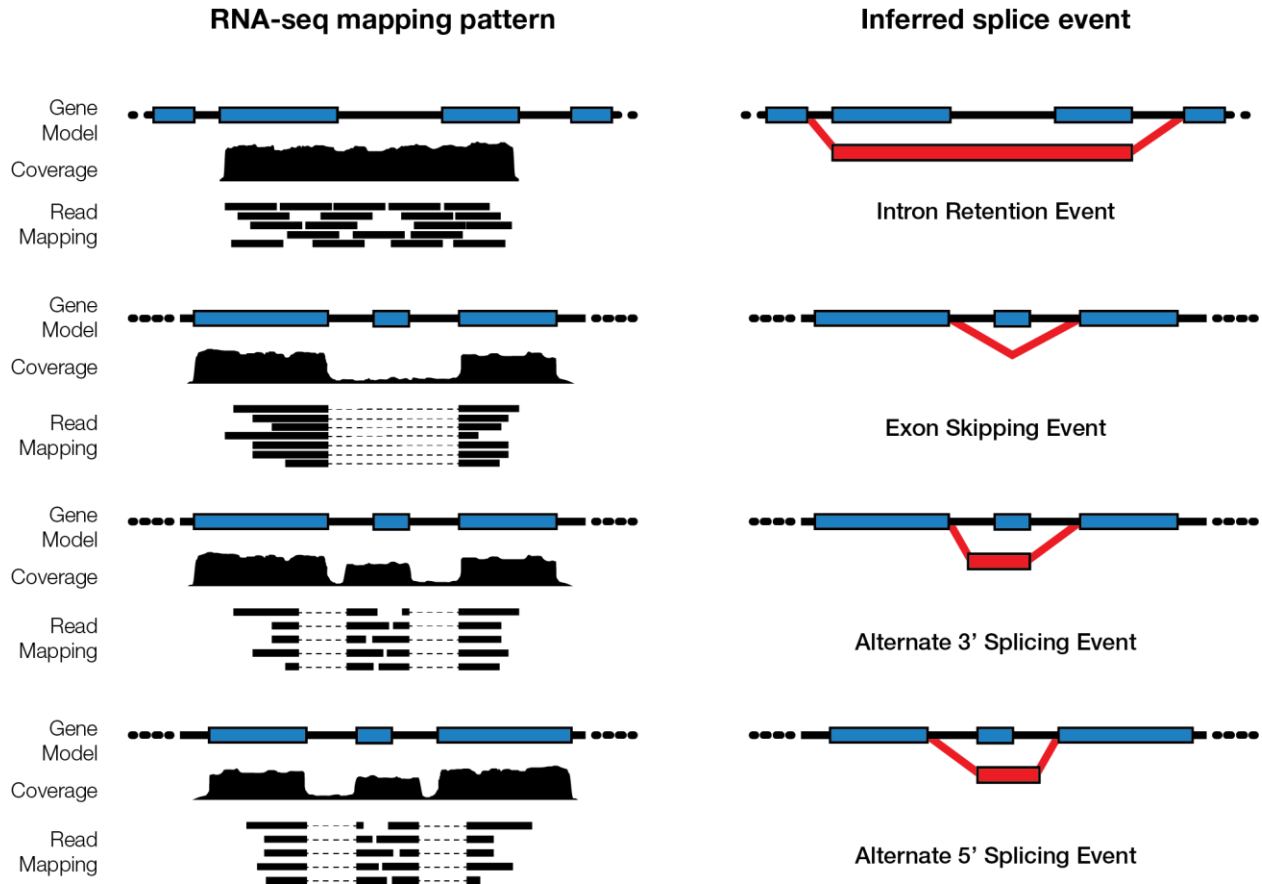

Supplementary Figure 2. **Alternative splicing event types analyzed here.** Four kinds of alternative splice events were analyzed for this study: intron retention, exon skipping, alternate 3' splicing, and alternate 5' splicing. Splicing events were identified and characterized based on the mapping of RNA-seq reads to gene models, using the program SplAdder as previously described [7]. For each type of splicing event, its corresponding RNA-seq read mapping pattern is shown adjacent to a schematic of the inferred splicing event type.

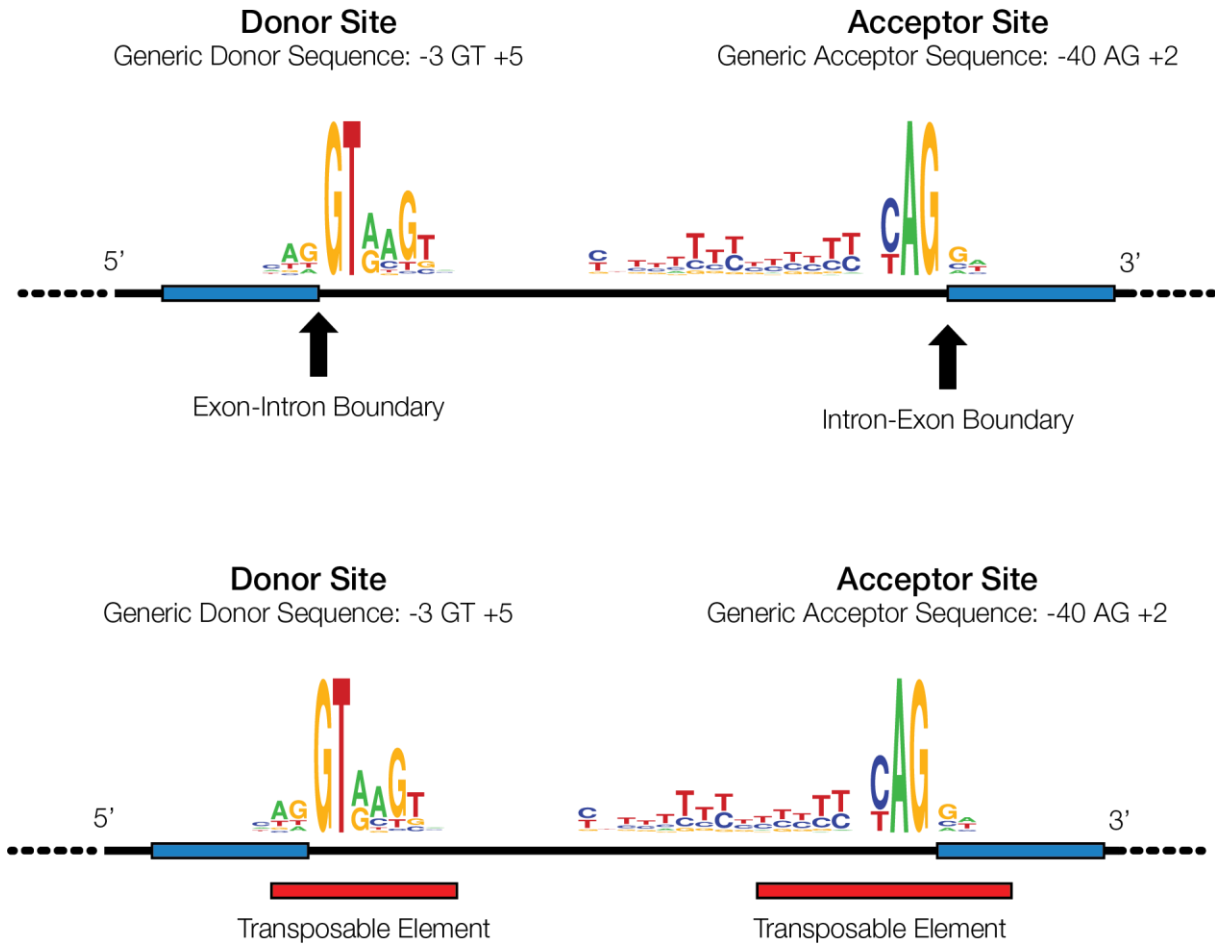

Supplementary Figure 3. **Scheme for the identification TE-derived splice sites.** The top panel shows 3' and 5' exon boundaries along with their canonical splice donor and acceptor site sequence motifs [11]. Potential TE-derived splice donor and acceptor sites were identified where TE sequences were found to overlap the canonical splice site motifs as shown in the bottom panel.

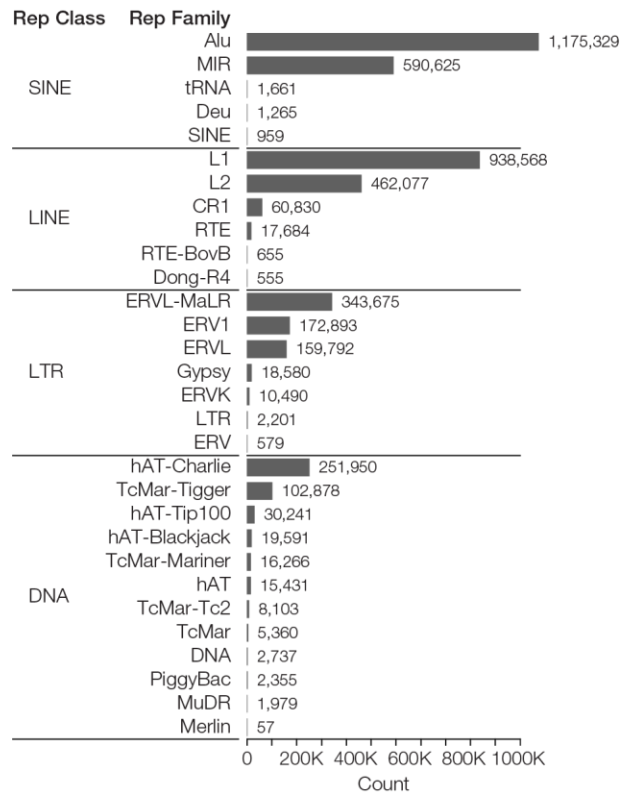

Supplementary Figure 4. **Counts of human transposable element (TE) sequences in the human genome.** TE names and counts are taken from RepeatMakser annotations. TEs are grouped into four major classes, and TE family names are shown for each class. The four major classes are: SINE – short interspersed nuclear element, LINE – long interspersed nuclear element, LTR – long terminal repeat containing element, and DNA – DNA-type element. SINEs, LINEs, and LTRs are retrotransposons that transpose via a copy and paste mechanism catalyzed by reverse transcriptase; DNA-type elements transpose via a cut and paste mechanism catalyzed the transposase enzyme.

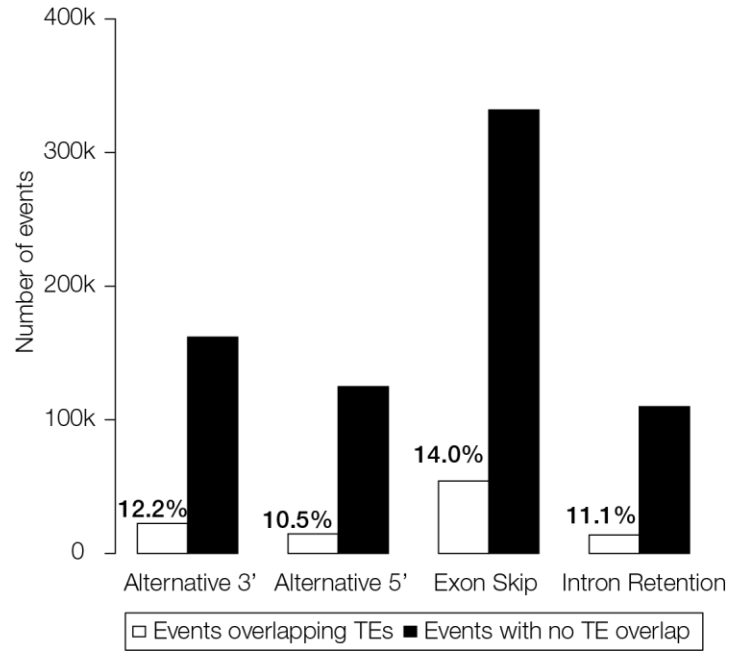

Supplementary Figure 5. **Number of alternative splice events seen for human genes.** Counts for the four different alternative splice event types are shown for TE-derived (white) versus non TE-derived isoforms (black). The percentages of TE-derived events are shown.

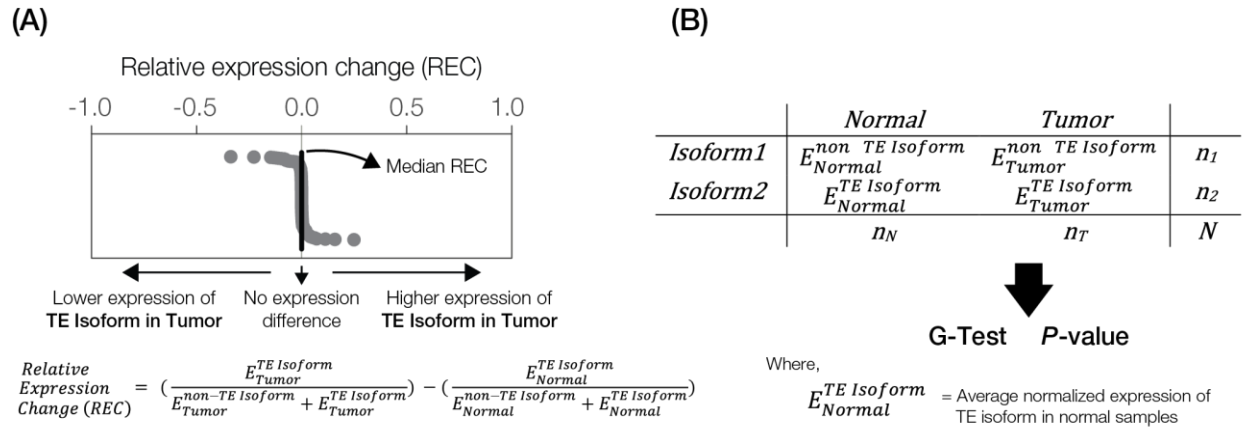

Supplementary Figure 6. **Quantification and statistical testing for differential expression of TE-derived alternative splice events.** (A) The relative Expression Change (REC) metric quantifies the normalized change in expression levels of TE-derived alternative splice isoforms in tumor versus normal tissue. This metric accounts for the expression of TE and non-TE isoform in both normal and tumor tissues. Higher REC values indicate relatively higher expression of TE isoform in tumor tissue and vice versa. Details on the expression counts and formulas can be found in the Methods section. (B) Formulation of the 2x2 contingency matrix used for the G-test of the significance of expression difference.



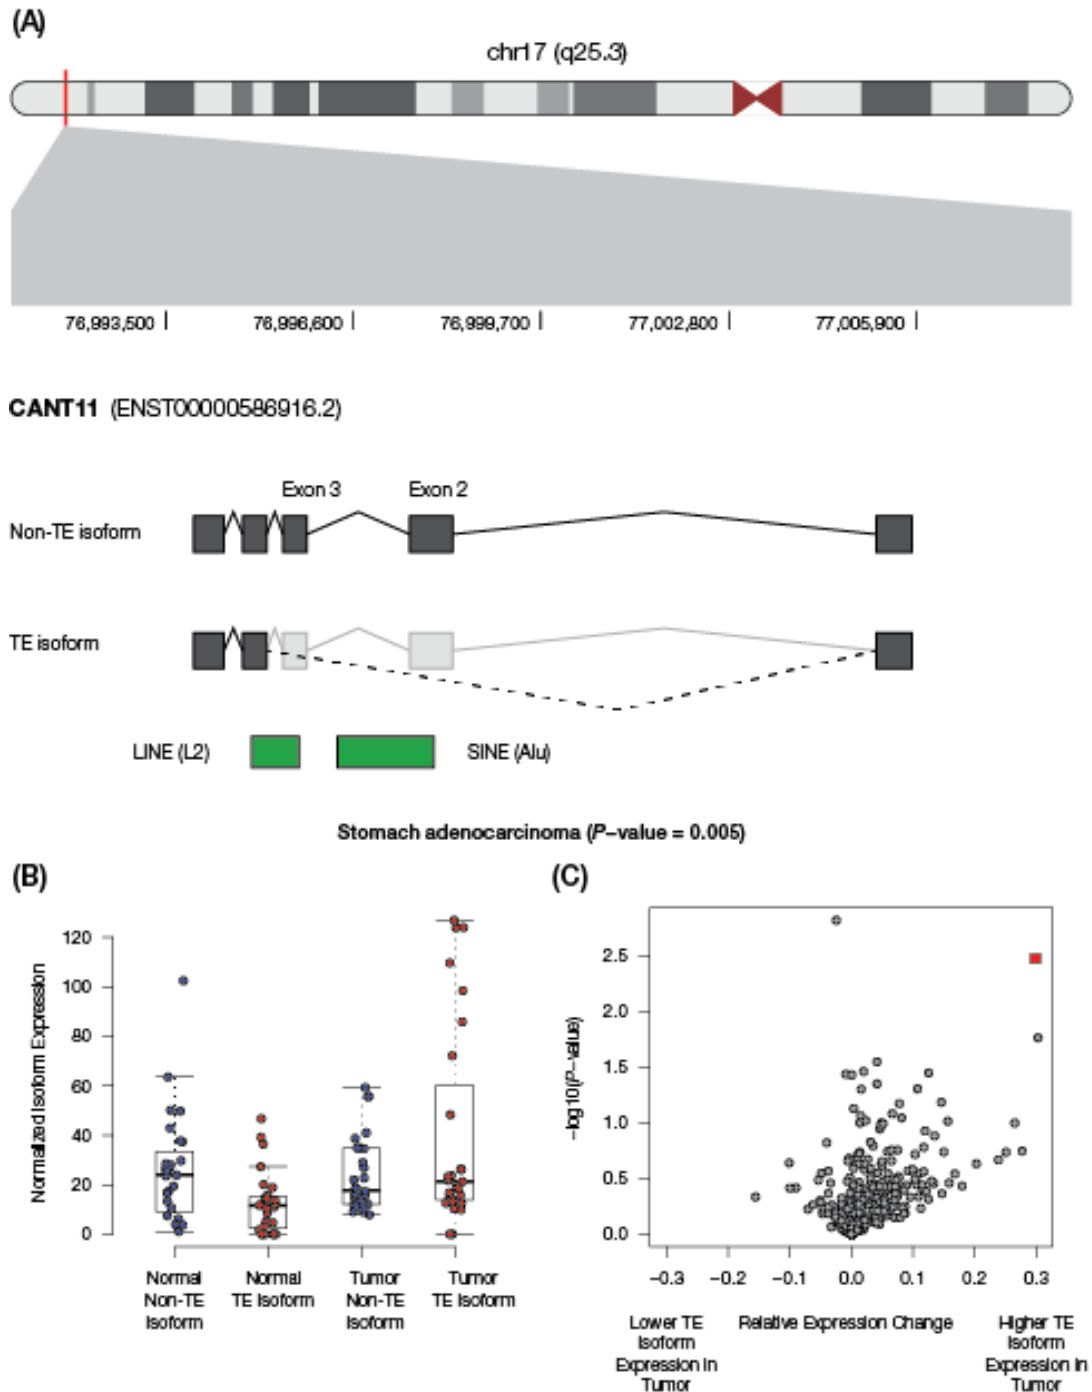

Supplementary Figure 7. **TE-derived alternative splicing in the *CANT1* gene.** (A) The location of *CANT1* on the long arm of chromosome 17 is shown along with the specific location of its TE-derived alternative splicing event. The presence of LINE and SINE sequences result in an exon skipping event. (B) Distributions of the non-TE (blue) and TE-derived (red) isoforms are shown for matched normal (left) and stomach adenocarcinoma samples (right). (C) Relative expression change (REC) values are plotted against the corresponding G-test  $P$ -values (see Methods and Supplementary Figure 6) for the matched normal and stomach adenocarcinoma samples. The *CANT1* TE-derived isoform values are shown as a red square.

Supplementary Table 2. **Candidate TE-derived isoform switching in cancer.** Supporting data are shown for the TE-derived isoform events described for KLK2 (Figure 4), MYH11 (Figure 5), WHSC1 (Figure 6), and CANT1 (Supplementary Figure 7).

| Cluster <sup>a</sup> | Gene         | Cancer Type                           | %TEi-N <sup>b</sup> | %TEi-T <sup>c</sup> | Event Type | TE coords <sup>d</sup>     | Exon coords <sup>e</sup>                           |
|----------------------|--------------|---------------------------------------|---------------------|---------------------|------------|----------------------------|----------------------------------------------------|
| 467                  | <i>MYH11</i> | Lung squamous cell carcinoma          | 6.5                 | 51.8                | Alt3       | chr16:15802811-15803103    | chr16:15931764-15932126                            |
| 412                  | <i>CANT1</i> | Stomach adenocarcinoma                | 67.3                | 37.4                | Exon (Alu) | chr17:76995725-76996032    | chr17:76993921-76994045                            |
|                      |              |                                       |                     |                     | Exon (L2)  | chr17:76994098-76994182    | chr17:76994229-76994368                            |
| 132                  | <i>WHSC1</i> | Stomach adenocarcinoma                | 73.1                | 42.8                | Exon       | chr4:1913852-1914626       | chr4:1913817-1913921                               |
| 412                  | <i>CANT1</i> | Breast invasive carcinoma             | 53.5                | 32.1                | Exon       | Refer to cluster 412 above |                                                    |
| 154                  | <i>KMT2D</i> | Stomach adenocarcinoma                | 21.3                | 31.8                | Alt5       | chr12:49417694-49417936    | chr12:49415825-49415934                            |
| 397                  | <i>POLG</i>  | Stomach adenocarcinoma                | 34.8                | 54.6                | Alt3       | chr15:89861214-89861324    | chr15:89862161-89862330                            |
| 397                  | <i>POLG</i>  | Bladder Urothelial Carcinoma          | 34.8                | 47.6                | Alt3       | Refer to cluster 397 above |                                                    |
| 261                  | <i>PML</i>   | Kidney renal papillary cell carcinoma | 57.2                | 70.3                | Intron     | chr15:74327328-74327503    | chr15:74326818-74326871<br>chr15:74327512-74328735 |
| 261                  | <i>PML</i>   | Breast invasive carcinoma             | 47.0                | 59.6                | Intron     | Refer to cluster 261 above |                                                    |
| 261                  | <i>PML</i>   | Kidney Chromophobe                    | 65.5                | 75.8                | Intron     | Refer to cluster 261 above |                                                    |

<sup>a</sup>Cluster id number corresponding to the distinct TE-derived alternative splicing event.

<sup>b</sup>Relative expression (percentage of total) for the TE-derived isoform in normal tissue.

<sup>c</sup>Relative expression (percentage of total) for the TE-derived isoform in tumor tissue.

<sup>d</sup>Coordinates of the associated TE

<sup>e</sup>Coordinates of the alternatively spliced exon(s)

## References

- [1] Weinstein, J. N., Collisson, E. A., Mills, G. B., Shaw, K. R. M., Ozenberger, B. A., Ellrott, K., Shmulevich, I., Sander, C., Stuart, J. M. & Network, C. G. A. R. 2013 The cancer genome atlas pan-cancer analysis project. *Nature genetics* **45**, 1113.
- [2] Forbes, S. A., Beare, D., Gunasekaran, P., Leung, K., Bindal, N., Boutselakis, H., Ding, M., Bamford, S., Cole, C. & Ward, S. 2014 COSMIC: exploring the world's knowledge of somatic mutations in human cancer. *Nucleic acids research* **43**, D805-D811.
- [3] Smit, A., Hubley, R. & Green, P. 2015 RepeatMasker Open-4.0. 2013–2015. (
- [4] O'Leary, N. A., Wright, M. W., Brister, J. R., Ciufo, S., Haddad, D., McVeigh, R., Rajput, B., Robbertse, B., Smith-White, B., Ako-Adjei, D., et al. 2016 Reference sequence (RefSeq) database at NCBI: current status, taxonomic expansion, and functional annotation. *Nucleic Acids Res* **44**, D733-745. (DOI:10.1093/nar/gkv1189).
- [5] Frankish, A., Diekhans, M., Ferreira, A. M., Johnson, R., Jungreis, I., Loveland, J., Mudge, J. M., Sisu, C., Wright, J., Armstrong, J., et al. 2019 GENCODE reference annotation for the human and mouse genomes. *Nucleic Acids Res* **47**, D766-D773. (DOI:10.1093/nar/gky955).
- [6] Kahles, A., Lehmann, K.-V., Toussaint, N. C., Hüser, M., Stark, S. G., Sachsenberg, T., Stegle, O., Kohlbacher, O., Sander, C. & Caesar-Johnson, S. J. 2018 Comprehensive analysis of alternative splicing across tumors from 8,705 patients. *Cancer cell* **34**, 211-224. e216.
- [7] Kahles, A., Ong, C. S., Zhong, Y. & Rättsch, G. 2016 SplAdder: identification, quantification and testing of alternative splicing events from RNA-Seq data. *Bioinformatics* **32**, 1840-1847.
- [8] Quinlan, A. R. 2014 BEDTools: the Swiss-army tool for genome feature analysis. *Current protocols in bioinformatics* **47**, 11.12. 11-11.12. 34.
- [9] Love, M. I., Huber, W. & Anders, S. 2014 Moderated estimation of fold change and dispersion for RNA-seq data with DESeq2. *Genome biology* **15**, 550.
- [10] Kent, W. J., Sugnet, C. W., Furey, T. S., Roskin, K. M., Pringle, T. H., Zahler, A. M. & Haussler, D. 2002 The human genome browser at UCSC. *Genome research* **12**, 996-1006.
- [11] Stephens, R. M. & Schneider, T. D. 1992 Features of spliceosome evolution and function inferred from an analysis of the information at human splice sites. *J Mol Biol* **228**, 1124-1136. (DOI:10.1016/0022-2836(92)90320-j).
